# Supplementary material for: 2-(2-Hydroxy-5-nitrobenzylidene)-1,3-indanedione versus Fluorescein Isothiocyanate in Interaction with Anti-hFABP Immunoglobulin G1: Fluorescence Quenching, Secondary Structure Alteration and Binding Sites Localization
Source: Int J Mol Sci. 2013 Jan 31;14(2):3011–25. doi: 10.3390/ijms14023011 (PMC3588028; doi:10.3390/ijms14023011)

## Supplementary Information

**Figure S1.** Non-linear scatchard plot indicating the presence of more than one class of binding sites for HNBID and FITC on anti h-FABP.

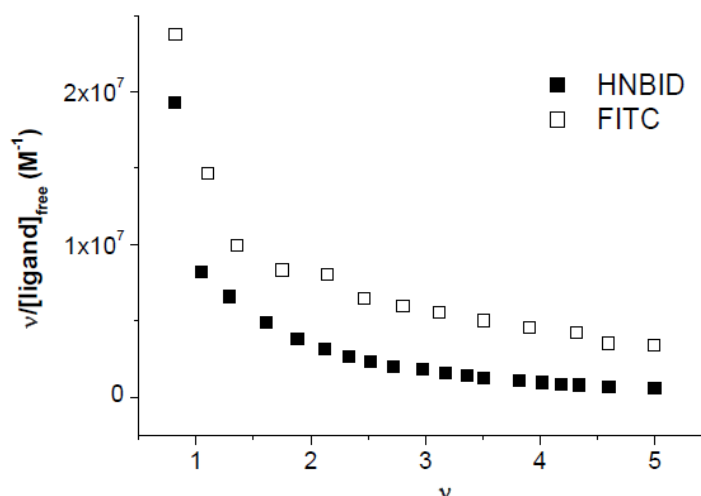

**Figure S2.** (a) Synchronous fluorescence spectra of anti h-FABP (0.85  $\mu\text{M}$ ) in absence (1) and presence (2–4) of increasing amounts of FITC (in the range 0–11  $\mu\text{M}$ ); (b) Stern-Volmer plots.

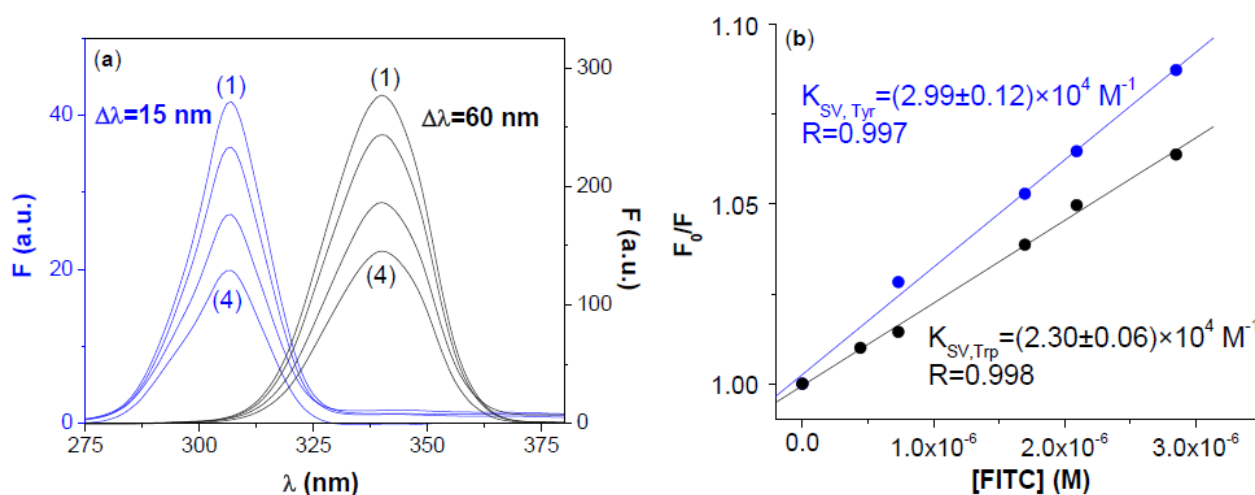

Supplement: Supplementary File 1 — Supplementary Information (PDF, 110 KB) [file ijms-14-03011-s001.pdf]
